# Supplementary material for: Investigating the appraisal structure of spontaneous thoughts: evidence for differences among unexpected thought, involuntary autobiographical memories, and ruminative thought
Source: Springer Nature journal article supplement (doi:10.1007/s00426-023-01814-y), 2023-03-31
Supplement: MOESM1 [file 25198166]

**Investigating the Appraisal Structure of Spontaneous Thoughts: Evidence for Differences Among Unexpected Thought, Involuntary Autobiographical Memories, and Ruminative Thought**

Cati Poulos<sup>1,2</sup>, Andre Zamani<sup>3</sup>, David Pillemer<sup>1</sup>, Michelle Leichtman<sup>1</sup>, Kalina Christoff<sup>3,4</sup>,  
Caitlin Mills<sup>1,2</sup>

<sup>1</sup>Department of Psychology, University of New Hampshire, Durham, NH, USA

<sup>2</sup>Department of Educational Psychology, University of Minnesota Twin Cities,  
Minneapolis, MN, USA

<sup>3</sup>Department of Psychology, and <sup>4</sup>Centre for Brain Health, University of British  
Columbia, Vancouver, British Columbia, Canada

**Corresponding Author (Current Address)**

Cati Poulos

56 E River Road

University of Minnesota Twin Cities

Minneapolis, MN 55455

[mcatipoulos@gmail.com](mailto:mcatipoulos@gmail.com)

**Table 1**

*AMCQ: Appraisal Dimensions, Scales, and Appraisal Items (Adapted from Boyacioglu & Akfirat, 2015)*

| <b>Appraisal Dimension</b> | <b>Question</b><br><b>Scale: 1 (Completely disagree) to 7 (Completely agree)</b>                                                                                                                                                                                                                                                                                                                                                                                                                                                                                                                                                                                                                                                                                                                                                                                                                                                          |
|----------------------------|-------------------------------------------------------------------------------------------------------------------------------------------------------------------------------------------------------------------------------------------------------------------------------------------------------------------------------------------------------------------------------------------------------------------------------------------------------------------------------------------------------------------------------------------------------------------------------------------------------------------------------------------------------------------------------------------------------------------------------------------------------------------------------------------------------------------------------------------------------------------------------------------------------------------------------------------|
| Vividness                  | (1) I remember the <b>unexpected thought/repetitive thought/memory</b> vividly<br>(2) I remember the <b>unexpected thought/repetitive thought/memory</b> very clearly<br>(3) The things I experienced during the <b>unexpected thought/repetitive thought/memory</b> are so vivid that I feel as though it just happened yesterday<br>(4) I can remember the situation in which the <b>unexpected thought/repetitive thought/memory</b> occurred vividly, as though I were there<br>(5) If I asked, I could make a film about the <b>unexpected thought/repetitive thought/memory</b> that would depict exactly what happened, because I remember it so clearly                                                                                                                                                                                                                                                                           |
| Belief in accuracy         | (1) I think that the <b>unexpected thought/repetitive thought/memory</b> may have occurred differently than how I remember it (R)<br>(2) I am seriously doubtful that the <b>unexpected thought/repetitive thought/memory</b> occurred in the way I remember it (R)<br>(3) The <b>unexpected thought/repetitive thought/memory</b> occurred exactly the way I remember it<br>(4) As I remember the <b>unexpected thought/repetitive thought/memory</b> , I have not imagined or fabricated anything that did not occur<br>(5) I am sure that the <b>unexpected thought/repetitive thought/memory</b> occurred in the way I remember it                                                                                                                                                                                                                                                                                                    |
| Place details              | (1) I can remember the city in which the <b>unexpected thought/repetitive thought/memory</b> took place<br>(2) I can remember the country in which the <b>unexpected thought/repetitive thought/memory</b> took place                                                                                                                                                                                                                                                                                                                                                                                                                                                                                                                                                                                                                                                                                                                     |
| Sensory details            | (1) I can remember my body position or my posture or how I acted during the <b>unexpected thought/repetitive thought/memory</b><br>(2) As I remember this <b>unexpected thought/repetitive thought/memory</b> , I can see the details or the colors of the things related to the <b>unexpected thought/repetitive thought/memory</b> (such as the furniture or the wallpaper)<br>(3) I can remember tactile details (such as temperature or pain) about the <b>unexpected thought/repetitive thought/memory</b> .<br>(4) As I remember this <b>unexpected thought/repetitive thought/memory</b> , I can sense the odor (such as damp or perfume of someone close to you) surrounding the <b>unexpected thought/repetitive thought/memory</b><br>(5) As I remember this <b>unexpected thought/repetitive thought/memory</b> , I can hear the sounds that I heard during the <b>unexpected thought/repetitive thought/memory</b> in my mind |
| Accessibility              | (1) I had to search my memory to recall this <b>unexpected thought/repetitive thought/memory</b> (R)<br>(2) I had to think for a while to recall this <b>unexpected thought/repetitive thought/memory</b> (R)<br>(3) I do not recall this <b>unexpected thought/repetitive thought/memory</b> very often (R)                                                                                                                                                                                                                                                                                                                                                                                                                                                                                                                                                                                                                              |
| Sharing                    | (1) I often share this <b>unexpected thought/repetitive thought/memory</b> with others<br>(2) I often talk about this <b>unexpected thought/repetitive thought/memory</b> with my friends or family                                                                                                                                                                                                                                                                                                                                                                                                                                                                                                                                                                                                                                                                                                                                       |

ONLINE RESOURCE 1

|                      |                                                                                                                                                                                                                                                                                                                                                                                                                                                                                                                                                                                                                                                                                                                                                                                                                                                                  |
|----------------------|------------------------------------------------------------------------------------------------------------------------------------------------------------------------------------------------------------------------------------------------------------------------------------------------------------------------------------------------------------------------------------------------------------------------------------------------------------------------------------------------------------------------------------------------------------------------------------------------------------------------------------------------------------------------------------------------------------------------------------------------------------------------------------------------------------------------------------------------------------------|
|                      | <p>(3) Since it happened, I have talked about this <b>unexpected thought/repetitive thought/memory</b> with others many times</p> <p>(4) I have not talked about the <b>unexpected thought/repetitive thought/memory</b> with others (R)</p> <p>(5) I do not share this <b>unexpected thought/repetitive thought/memory</b> with others (R)</p>                                                                                                                                                                                                                                                                                                                                                                                                                                                                                                                  |
| Observer perspective | <p>(1) As I remember the <b>unexpected thought/repetitive thought/memory</b>, I feel as though I am seeing the <b>event</b> as an outside observer</p> <p>(2) As I remember the <b>unexpected thought/repetitive thought/memory</b>, I feel as though I am watching a short film about someone else</p> <p>(3) As I remember the <b>unexpected thought/repetitive thought/memory</b>, I feel as though I am looking at the past me and others around me from above or far away</p>                                                                                                                                                                                                                                                                                                                                                                               |
| Field perspective    | <p>(1) As I remember the <b>unexpected thought/repetitive thought/memory</b>, I imagine it again through my own eyes</p> <p>(2) I view this <b>unexpected thought/repetitive thought/memory</b> through my own eyes, from my own perspective</p> <p>(3) As I remember the <b>unexpected thought/repetitive thought/memory</b>, I feel as though I am seeing the <b>unexpected thought/repetitive thought/memory</b> out of my own eyes rather than as an outside observer</p>                                                                                                                                                                                                                                                                                                                                                                                    |
| Narrative coherence  | <p>(1) This <b>unexpected thought/repetitive thought/memory</b> comes back to me in disjointed pieces (R)</p> <p>(2) This <b>unexpected thought/repetitive thought/memory</b> comes back to me in disjointed flashbacks (R)</p> <p>(3) As I remember the <b>unexpected thought/repetitive thought/memory</b>, there are gaps and some things I cannot remember in the storyline (R)</p> <p>(4) The order of events in the <b>unexpected thought/repetitive thought/memory</b> is incoherent and confusing (R)</p> <p>(5) I remember the <b>unexpected thought/repetitive thought/memory</b> in chronological order (before, during and after)</p>                                                                                                                                                                                                                |
| Recollection         | <p>(1) As I remember the <b>unexpected thought/repetitive thought/memory</b>, I feel as though I am travelling to the time it happened</p> <p>(2) As I remember the <b>unexpected thought/repetitive thought/memory</b>, I feel as though I travelled back and become the same person in the <b>unexpected thought/repetitive thought/memory</b></p> <p>(3) As I remember the <b>unexpected thought/repetitive thought/memory</b>, I feel as though I am reliving it</p> <p>(4) As I remember the <b>unexpected thought/repetitive thought/memory</b>, I feel as if I am thinking the same things or feeling the same emotions as I did during the <b>unexpected thought/repetitive thought/memory</b></p> <p>(5) As I think about the <b>unexpected thought/repetitive thought/memory</b>, I actually remember it rather than just knowing that it happened</p> |
| Emotional valence    | <p>(1) The experience I recall is quite negative (R)</p> <p>(2) The experience I recall is quite positive</p> <p>(3) My feelings at the time of the <b>unexpected thought/repetitive thought/memory</b> were quite negative (R)</p> <p>(4) My overall feeling about the <b>unexpected thought/repetitive thought/memory</b> is quite negative (R)</p> <p>(5) My feelings at the time of the <b>unexpected thought/repetitive thought/memory</b> were quite positive</p> <p>(6) My overall feeling about the <b>unexpected thought/repetitive thought/memory</b> is quite positive</p>                                                                                                                                                                                                                                                                            |
| Emotional intensity  | <p>(1) While remembering the <b>unexpected thought/repetitive thought/memory</b> now, my feelings are quite weak (R)</p> <p>(2) While remembering the <b>unexpected thought/repetitive thought/memory</b> now, my feelings are quite intense</p> <p>(3) My memory of this <b>unexpected thought/repetitive thought/memory</b> evokes very weak emotions in me (R)</p> <p>(4) When I focus the <b>unexpected thought/repetitive thought/memory</b>, I feel very intense emotions</p> <p>(5) My memory of this <b>unexpected thought/repetitive thought/memory</b> evokes very strong emotions in me</p>                                                                                                                                                                                                                                                           |

ONLINE RESOURCE 1

|                             |                                                                                                                                                                                                                                                                                                                                                                                                                                                                                                                                                                                                                                                                                                                                                                                                                                                                                                                                                                                      |
|-----------------------------|--------------------------------------------------------------------------------------------------------------------------------------------------------------------------------------------------------------------------------------------------------------------------------------------------------------------------------------------------------------------------------------------------------------------------------------------------------------------------------------------------------------------------------------------------------------------------------------------------------------------------------------------------------------------------------------------------------------------------------------------------------------------------------------------------------------------------------------------------------------------------------------------------------------------------------------------------------------------------------------|
| Emotional distancing        | <p>(1) As I remember the <b>unexpected thought/repetitive thought/memory</b>, I bottle up my feelings</p> <p>(2) While talking about this <b>unexpected thought/repetitive thought/memory</b>, I relate what happened rather than what I felt or thought.</p> <p>(3) As I remember the <b>unexpected thought/repetitive thought/memory</b>, I smother my feelings</p> <p>(4) As I remember the <b>unexpected thought/repetitive thought/memory</b>, although my feelings are important to me, I prefer to ignore them</p>                                                                                                                                                                                                                                                                                                                                                                                                                                                            |
| Preoccupation with emotions | <p>(1) This <b>unexpected thought/repetitive thought/memory</b> is still difficult to think about because of the feelings that the <b>unexpected thought/repetitive thought/memory</b> evokes</p> <p>(2) As I remember the <b>unexpected thought/repetitive thought/memory</b>, my feelings are so intense that I cannot focus on any activity after that</p> <p>(3) As I remember the <b>unexpected thought/repetitive thought/memory</b>, I feel lost in my thoughts because of my feelings.</p> <p>(4) While talking about this <b>unexpected thought/repetitive thought/memory</b>, I feel such an intense need to share my feelings that I cannot tell the <b>unexpected thought/repetitive thought/memory</b> as a coherent story</p> <p>(5) As I remember the <b>unexpected thought/repetitive thought/memory</b>, I cannot focus on anything except my feelings</p> <p>(6) As I remember the <b>unexpected thought/repetitive thought/memory</b>, my feelings confuse me</p> |

## Experiment 2 AMCQ Results

All dimensions and corresponding statements for the AMCQ are provided in Table 1. Additionally, means, standard deviations, and Cohen's  $d$  values are provided in Table 2, and Chi-square values,  $b$  coefficients, and  $p$ -values are provided in Table 3. For conciseness, we found a significant main effect of Condition for *all* appraisal dimensions with two exceptions ( $\alpha = .001$ ): field perspective ( $p = .349$ ) and narrative coherence ( $p = .017$ ). We thus refer readers to Table 3 for specific values regarding main effects, and below we focus on pairwise comparisons.

### Vividness

Pairwise comparisons indicated that unexpected thought was significantly less vivid compared to IAM and ruminative thought. There was no significant difference between IAM and ruminative thought. These results are in line with the IAM literature, as memories that are easily able to be recalled are often the most vivid memories (Barzykowski & Niedźwieńska, 2016).

### Accuracy

Unexpected thought recalls were reported to be accurate significantly less compared to IAM and ruminative thought. There was no significant difference between IAM and ruminative thought.

### Place Details

Unexpected thought had significantly less place details compared to IAM. There was no significant difference between unexpected thought and ruminative thought. Further, IAM had significantly more place details than ruminative thought.

### Sensory Details

## ONLINE RESOURCE 1

Unexpected thought had significantly less sensory details compared to IAM. There was no significant difference between unexpected thought and ruminative thought. Further, IAM had significantly more sensory details than ruminative thought. Again, these results, along with the place details results, are in line with the IAM literature, as memories that are able to be recalled often contain the most detailed information (Barzykowski & Niedźwieńska, 2016).

### **Accessibility**

Unexpected thought was significantly less accessible compared to both IAM and ruminative thought. Further, IAM was significantly less accessible compared to ruminative thought. These results may be explainable by the idea that unexpected thought and IAM are both cued events which may be seemingly unrelated to current internal or external states, making them less accessible to recall, while RUM is often characterized by a focus on personal concerns or goals.

### **Sharing**

Unexpected thought was shared with others significantly less compared to IAM and ruminative thought. Further, IAM was shared with others significantly more compared to ruminative thought.

### **Observer Perspective**

Unexpected thought was reported to have an observer perspective significantly less compared to IAM. There was no significant difference between unexpected thought and ruminative thought. Further, IAM was reported to have an observer perspective significantly more compared to ruminative thought.

### **Field Perspective**

## ONLINE RESOURCE 1

There was no significant main effect of Condition.

### **Narrative Coherence**

No significant main effect of Condition was observed.

### **Recollection**

Unexpected thought recalls were reported to induce a sense of reliving the original experience significantly less compared to IAM. Further, IAM recalls induced a sense of reliving the original experience significantly more compared to ruminative thought. There was no significant difference between unexpected thought and ruminative thought.

### **Valence**

Unexpected thought was significantly less positive in valence compared to IAM. However, unexpected thought was significantly more positive in valence compared to ruminative thought. Further, IAM was significantly more positive in valence compared to ruminative thought.

### **Emotional Intensity**

Unexpected thought was significantly less emotionally intense compared to IAM and ruminative thought. There was no significant difference between IAM and ruminative thought.

### **Emotional Distancing**

IAM was significantly less likely to lead to a distancing from emotions compared to ruminative thought. There was no significant difference between unexpected thought and IAM or between unexpected thought and ruminative thought.

### **Preoccupation with Emotion**

## ONLINE RESOURCE 1

IAM was significantly less likely to lead to a preoccupation with emotions compared to ruminative thought. There was no significant difference between unexpected thought and IAM or between unexpected thought and ruminative thought.



ONLINE RESOURCE 1

**Table 2**

*AMCQ Descriptive Statistics and Effect Sizes*

| <b>Variable</b>            | <b>UT<br/>M (SD)</b> | <b>IAM<br/>M (SD)</b> | <b>RUM<br/>M (SD)</b> | <b>Cohen's d<br/>UT-IAM</b> | <b>Cohen's d<br/>UT-RUM</b> | <b>Cohen's d<br/>IAM-RUM</b> |
|----------------------------|----------------------|-----------------------|-----------------------|-----------------------------|-----------------------------|------------------------------|
| Vividness                  | 3.95 (1.26)          | 4.43 (1.20)           | 4.23 (1.30)           | -0.39*                      | -0.22*                      | 0.15                         |
| Accuracy                   | 4.50 (1.00)          | 4.72 (1.00)           | 4.65 (1.00)           | -0.23*                      | -0.15*                      | 0.08                         |
| Place Details              | 5.28 (1.55)          | 5.70 (1.43)           | 5.39 (1.57)           | -0.28*                      | -0.08                       | 0.20*                        |
| Sensory Details            | 3.76 (1.26)          | 4.34 (1.24)           | 3.89 (1.34)           | -0.46*                      | -0.11                       | 0.34*                        |
| Accessibility              | 4.16 (1.18)          | 4.43 (1.20)           | 4.69 (1.24)           | -0.22*                      | -0.44*                      | -0.21*                       |
| Sharing                    | 3.34 (1.11)          | 3.82 (1.01)           | 3.52 (1.07)           | -0.45*                      | -0.16*                      | 0.28*                        |
| Observer Perspective       | 3.02 (1.43)          | 3.30 (1.48)           | 3.02 (1.45)           | -0.20*                      | -0.01                       | 0.19*                        |
| Field Perspective          | 4.55 (1.48)          | 4.63 (1.45)           | 4.59 (1.42)           | -0.06                       | -0.03                       | 0.03                         |
| Narrative Coherence        | 4.58 (1.05)          | 4.66 (1.10)           | 4.69 (1.00)           | -0.08                       | -0.11                       | -0.02                        |
| Recollection               | 3.72 (1.22)          | 4.21 (1.24)           | 3.87 (1.25)           | -0.40*                      | -0.13                       | 0.27*                        |
| Valence                    | 3.78 (1.19)          | 4.41 (1.28)           | 3.45 (1.18)           | -0.51*                      | 0.28*                       | 0.78*                        |
| Emotional intensity        | 3.67 (0.94)          | 3.99 (0.85)           | 3.94 (0.91)           | -0.35*                      | -0.29*                      | 0.05                         |
| Distancing                 | 3.07 (1.30)          | 2.97 (1.31)           | 3.24 (1.37)           | 0.08                        | -0.13                       | -0.20*                       |
| Preoccupation with Emotion | 2.86 (1.36)          | 2.75 (1.34)           | 3.01 (1.36)           | 0.08                        | -0.11                       | -0.19*                       |

\*p ≤ .001

ONLINE RESOURCE 1

**Table 3**

*AMCQ Chi-Squares, b coefficients, and p values*

| Variable                   | Main Effect (X <sup>2</sup> ) (p value) | Pairwise Comparisons (b) (p value) |                   |                   |
|----------------------------|-----------------------------------------|------------------------------------|-------------------|-------------------|
|                            |                                         | UT-IAM                             | UT-RUM            | IAM-RUM           |
| Vividness                  | 77.20 (p < .001)*                       | -0.48 (p < .001)*                  | -0.30 (p < .001)* | 0.19 (p = .002)   |
| Accuracy                   | 36.67 (p < .001)*                       | -0.23 (p < .001)*                  | -0.16 (p < .001)* | 0.07 (p = .151)   |
| Place Details              | 77.82 (p < .001)*                       | -0.42 (p < .001)*                  | -0.13 (p = .018)  | 0.29 (p < .001)*  |
| Sensory Details            | 143.27 (p < .001)*                      | -0.58 (p < .001)*                  | -0.14 (p = .018)  | 0.44 (p < .001)*  |
| Accessibility              | 87.77 (p < .001)*                       | -0.26 (p < .001)*                  | -0.52 (p < .001)* | -0.25 (p < .001)* |
| Sharing                    | 72.51 (p < .001)*                       | -0.48 (p < .001)*                  | -0.20 (p = .001)* | 0.27 (p < .001)*  |
| Observer Perspective       | 45.96 (p < .001)*                       | -0.31 (p < .001)*                  | 0.00 (p = .996)   | 0.31 (p < .001)*  |
| Field Perspective          | 2.10 (p = .349)                         | NA                                 | NA                | NA                |
| Narrative Coherence        | 8.11 (p = .017)                         | NA                                 | NA                | NA                |
| Recollection               | 115.86 (p < .001)*                      | -0.51 (p < .001)*                  | -0.17 (p = .002)  | 0.35 (p < .001)*  |
| Valence                    | 267.05 (p < .001)*                      | -0.64 (p < .001)*                  | 0.34 (p < .001)*  | 0.99 (p < .001)*  |
| Emotional intensity        | 59.12 (p < .001)*                       | -0.33 (p < .001)*                  | -0.27 (p < .001)* | 0.06 (p = .388)   |
| Distancing                 | 30.01 (p < .001)*                       | 0.10 (p = .078)                    | -0.16 (p = .003)  | -0.26 (p < .001)* |
| Preoccupation with Emotion | 32.31 (p < .001)*                       | 0.10 (p = .056)                    | -0.15 (p = .002)  | -0.25 (p < .001)* |

\*p ≤ .001

### References

- Barzykowski, K., & Niedźwieńska, A. (2016). The Effects of Instruction on the Frequency and Characteristics of Involuntary Autobiographical Memories. *PLOS ONE*, 11(6), e0157121. <https://doi.org/10.1371/journal.pone.0157121>
- Boyacioglu, I., & Akfirat, S. (2015). Development and psychometric properties of a new measure for memory phenomenology: The Autobiographical Memory Characteristics Questionnaire. *Memory*, 23(7), 1070–1092. <https://doi.org/10.1080/09658211.2014.953960>
